# Supplementary material for: Origins of boron catalysis in peroxymonosulfate activation and advanced oxidation
Source: Royal Society of Chemistry journal article supplement (doi:10.1039/c9ta04885e), 2019-01-01
Supplement: c9ta04885e1.pdf [file c9ta04885e1.pdf]

*Electronic Supplementary Information (ESI) for*

**Origins of boron catalysis in peroxymonosulfate activation and  
advanced oxidation**

Xiaoguang Duan<sup>a,\*</sup>, Wenlang, Li<sup>b</sup>, Jian Kang<sup>c</sup>, Wenjie Tian<sup>a</sup>, Huayang Zhang<sup>a</sup>, Shih-Hsin Ho<sup>d</sup>, Zhimin Ao<sup>b</sup>, Hongqi Sun<sup>c</sup>, Shaobin Wang<sup>a,c,\*</sup>

<sup>a</sup> School of Chemical Engineering and Advanced Materials, The University of Adelaide, Adelaide, SA 5005, Australia

<sup>b</sup> School of Environmental Science and Engineering, Institute of Environmental Health and Pollution Control, Guangdong University of Technology, Guangzhou 510006, China

<sup>c</sup> Department of Chemical Engineering, Curtin University, Perth, WA 6845, Australia

<sup>d</sup> State Key Laboratory of Urban Water Resource and Environment, School of Environment, Harbin Institute of Technology, Harbin, China

<sup>e</sup> School of Engineering, Edith Cowan University, Joondalup, WA 6027, Australia

\*Corresponding Authors:

[xiaoguang.duan@adelaide.edu.au](mailto:xiaoguang.duan@adelaide.edu.au) (X.D.)

[shaobin.wang@adelaide.edu.au](mailto:shaobin.wang@adelaide.edu.au) (S.W.)

### **Text S1 Detailed synthesis procedure of the transition metal oxides.**

**Manganese dioxide ( $\text{MnO}_2$ )** was prepared by a hydrothermal method.<sup>1</sup> Manganese sulfate monohydrate (0.008 mol  $\text{MnSO}_4 \cdot \text{H}_2\text{O}$ ) and an equal mole of ammonium persulfate ( $(\text{NH}_4)_2\text{S}_2\text{O}_8$ ) were dissolved in ultrapure distilled water and stirred to form a homogeneous solution. Then the mixture was transferred into an 80 mL Teflon-lined stainless-steel autoclave and treated at 140 °C for 12 h. The product was filtered, washed with distilled water and finally dried in an oven at 60 °C overnight.

**Manganese(II, III) oxide ( $\text{Mn}_3\text{O}_4$ )** was synthesized by calcination of the obtained  $\text{MnO}_2$  at 950 °C in air for 2 h to get  $\text{Mn}_3\text{O}_4$ .<sup>2</sup>

**Cobalt oxide ( $\text{Co}_3\text{O}_4$ )** was synthesized by a hydrothermal method.<sup>3</sup> Specifically, cobalt acetate tetrahydrate  $\text{Co}(\text{C}_2\text{H}_3\text{O}_2)_2 \cdot 4\text{H}_2\text{O}$ , 0.93 g) was dissolved in 70 mL  $\text{H}_2\text{O}$ , and then 10 mL of ammonium solution ( $\text{NH}_3 \cdot \text{H}_2\text{O}$ , 28%) was dropwise introduced into the solution. The mixture was transferred to a 120 mL Teflon-lined stainless-steel autoclave and treated at 180 °C for 12 h. The product was filtered, washed with distilled water and finally dried in an oven at 60 °C overnight.

**Synthesis of  $\text{Fe}_3\text{O}_4$**  was synthesised by a hydrothermal method.<sup>4</sup>  $\text{FeCl}_3 \cdot 6\text{H}_2\text{O}$  (0.02 mol) and  $\text{FeCl}_2 \cdot 4\text{H}_2\text{O}$  (0.01 mol) were dissolved in 80 mL of ultrapure water, followed by 1 h stirring. With stirring, 28% ammonia solution was added dropwisely at a rate of 0.5 mL/min with nitrogen bubbling (40 mL/min) to keep solution at pH = 10. The mixed solution was then transferred into a Teflon-lined autoclave (120 mL) and treated at 180 °C in an oven for 18 h. The product was filtered, washed with distilled water and finally dried in an oven at 60 °C overnight.

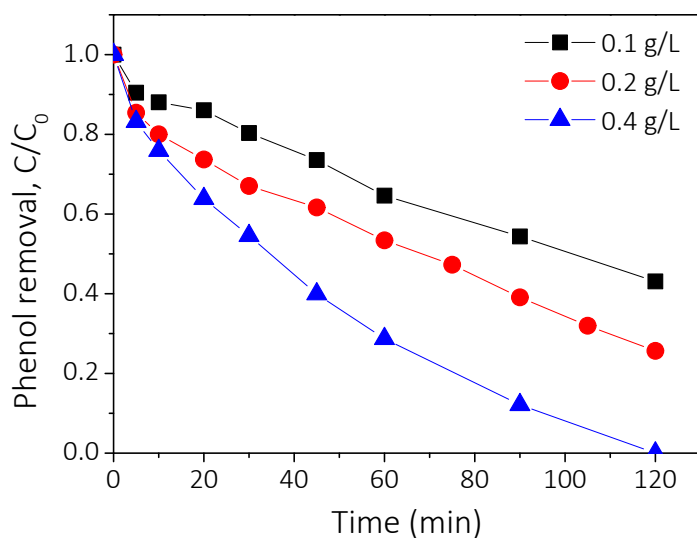

**Figure S1.** The effect of catalyst loading on catalytic phenol oxidation. (Experimental conditions: phenol = 0.1 mM, PMS = 3.3 mM, temperature = 25 °C.)

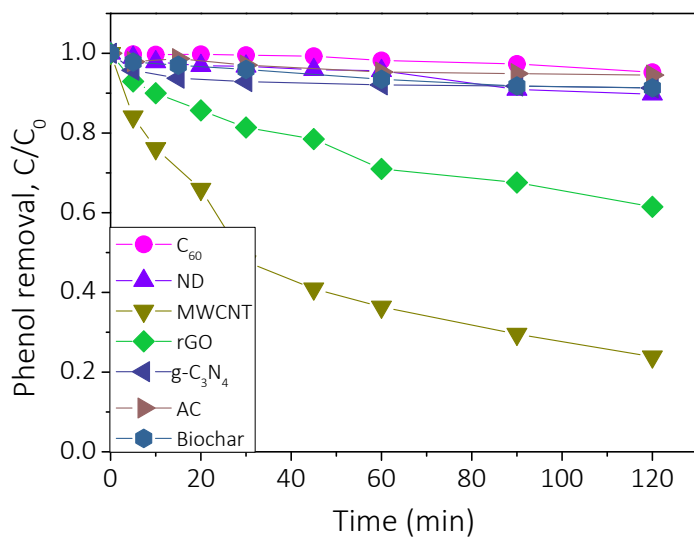

**Figure S2.** Catalytic performance of different carbocatalysts for PMS activation and phenol oxidation. (Experimental conditions: phenol = 0.1 mM, catalyst= 0.2 g/L, PMS = 3.3 mM, temperature = 25 °C.)

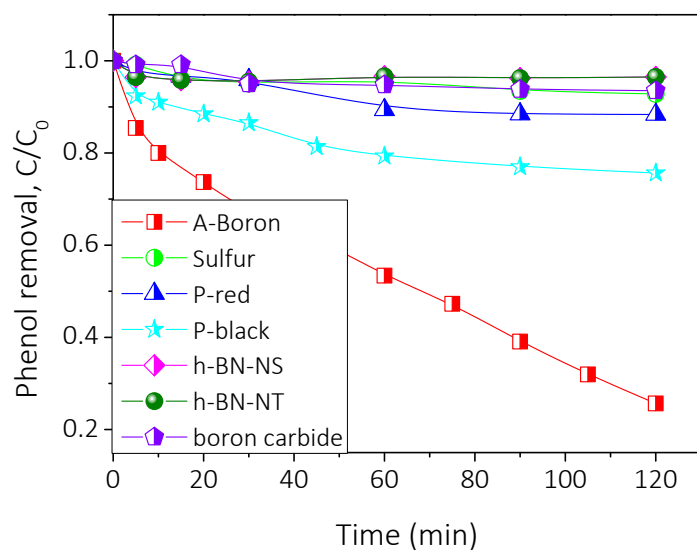

**Figure S3.** Catalytic performances of different metal-free non-carbon materials for PMS activation and phenol oxidation. (Experimental conditions: phenol = 0.1 mM, catalyst= 0.2 g/L, PMS = 3.3 mM, temperature = 25 °C.)

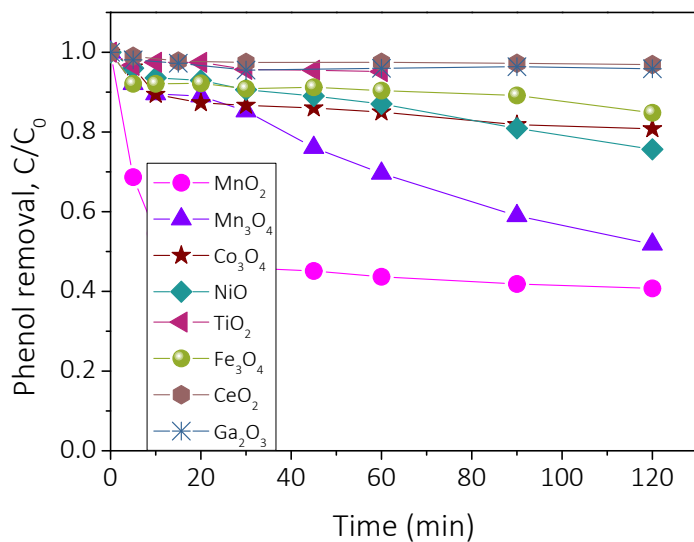

**Figure S4.** Catalytic performances of different transition metal oxides for PMS activation and phenol oxidation. (Experimental conditions: phenol = 0.1 mM, catalyst= 0.2 g/L, PMS = 3.3 mM, temperature = 25 °C.)

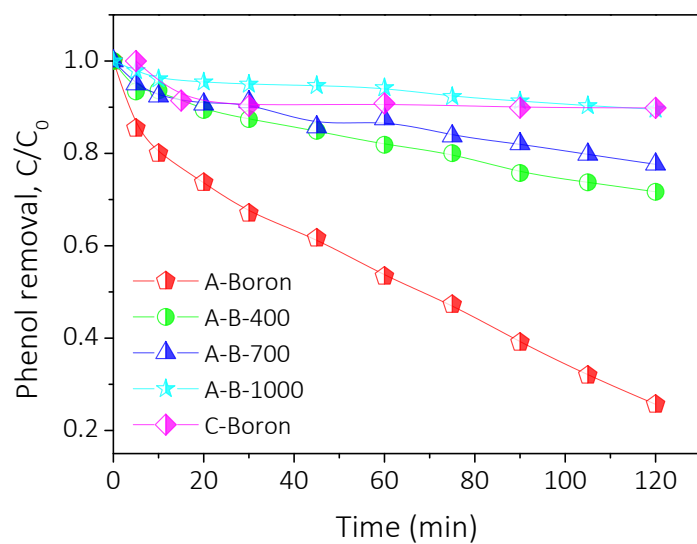

**Figure S5.** Catalytic performances of different boron materials for PMS activation and phenol oxidation. (Experimental conditions: phenol = 0.1 mM, catalyst= 0.2 g/L, PMS = 3.3 mM, temperature = 25 °C.)

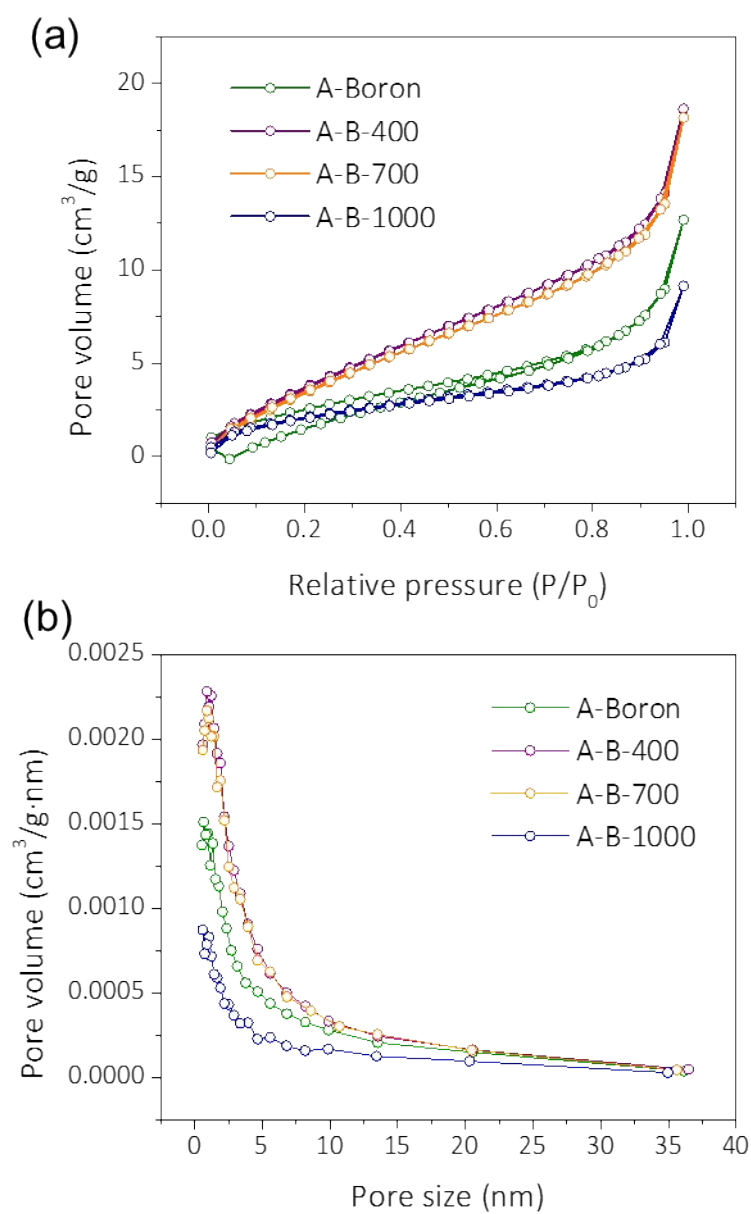

**Figure S6.** (a) Nitrogen adsorption isotherms and (b) pore size distribution of the boron samples.

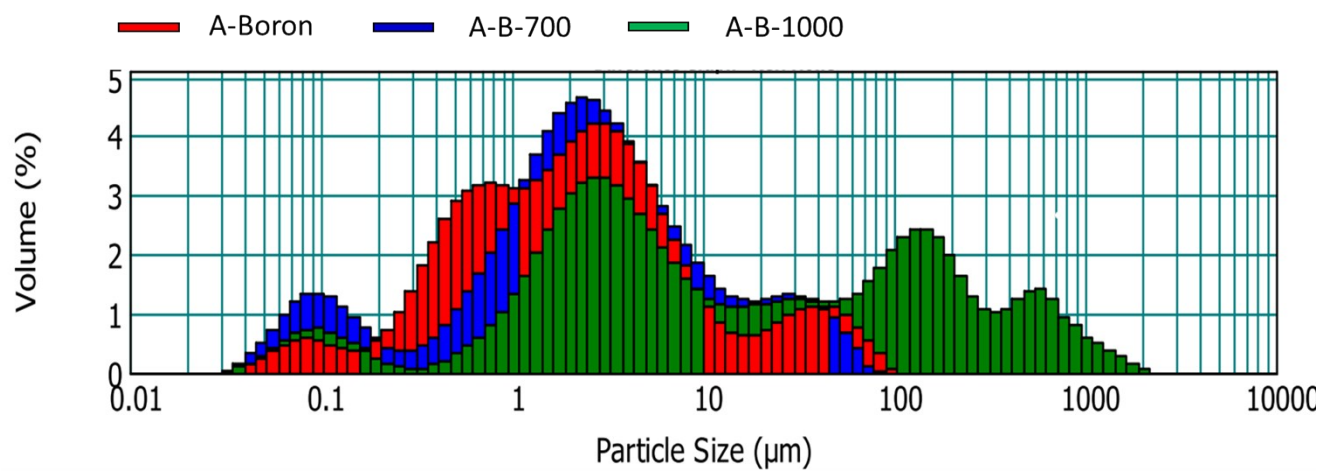

**Figure S7.** Particle size distribution analysis of different boron samples.

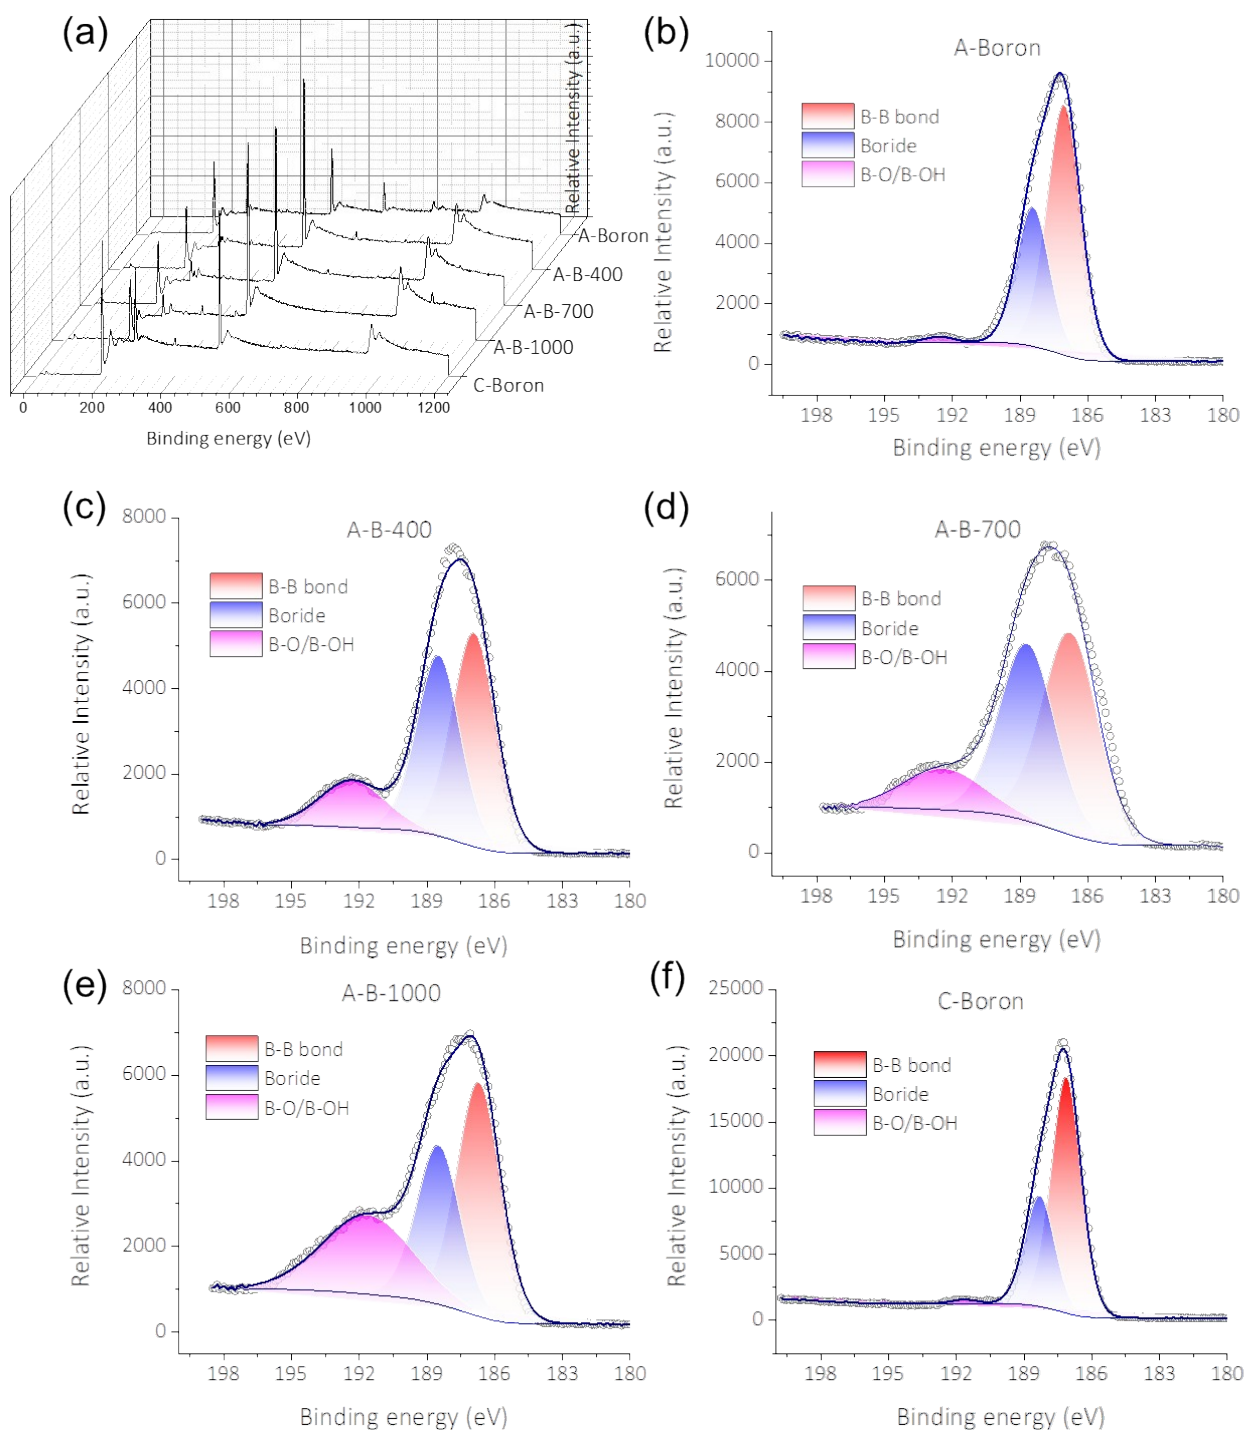

**Figure S8.** (a) XPS surveys of the boron samples. High-resolution XPS spectra of B 1s peak and fitting compounds of (b) A-Boron, (c) A-B-400, (d) A-B-700, (e) A-B-1000, and (f) C-Boron.



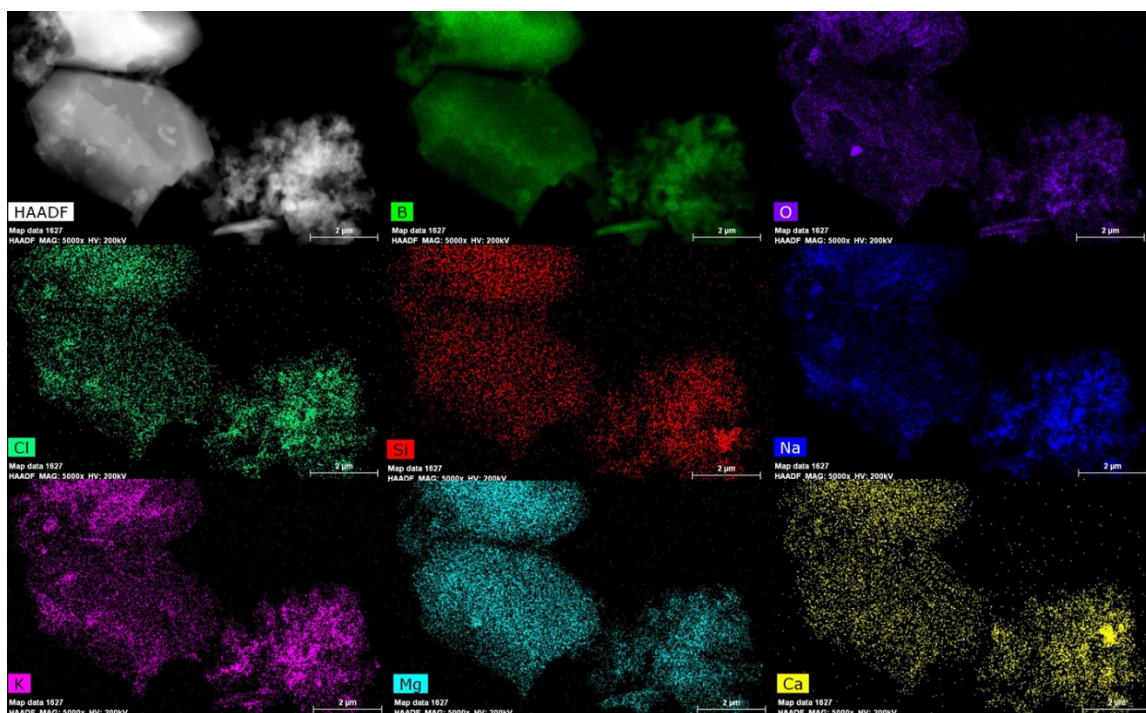

**Figure S9.** High-angle annular dark-field (HAADF) and EDX elemental mapping of A-Boron.

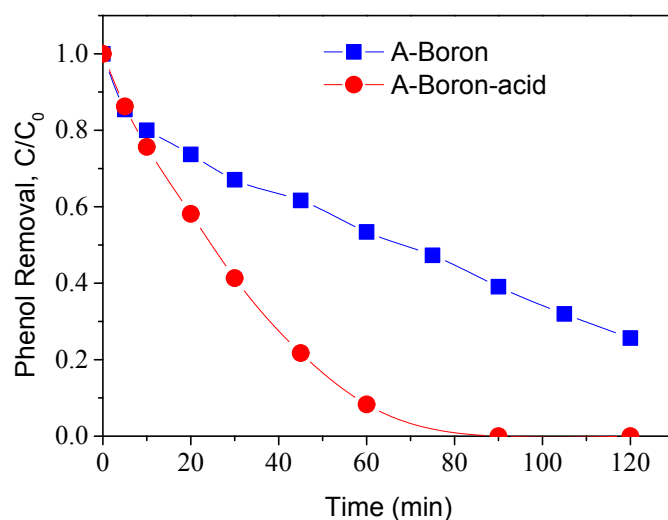

**Figure S10.** Comparison of the reactivities before (A-Boron) and after acid washing (A-Boron-acid, 1 wt.% HCl washing for 6 h). (Experimental conditions: phenol = 0.1 mM, catalyst= 0.2 g/L, PMS = 3.3 mM, temperature = 25 °C)

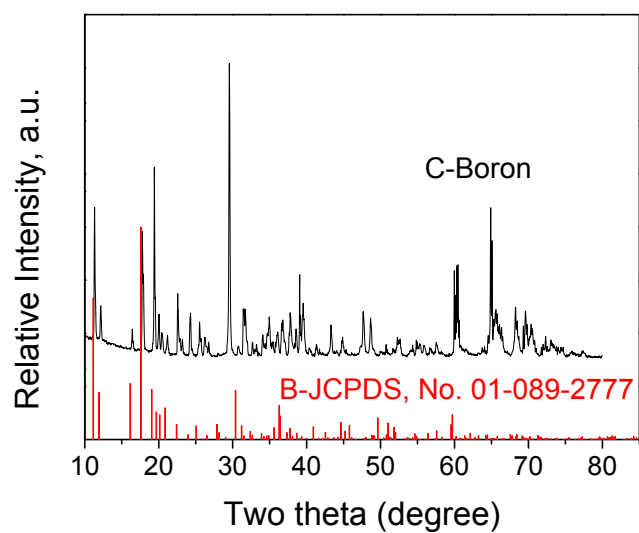

**Figure S11.** Comparison of XRD spectrum of C-Boron with Boron JCPDS card.

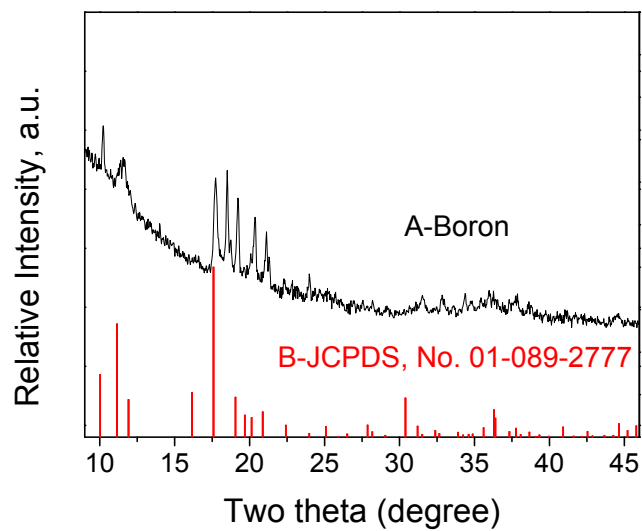

**Figure S12.** Comparison of XRD spectrum of A-Boron with Boron JCPDS card.

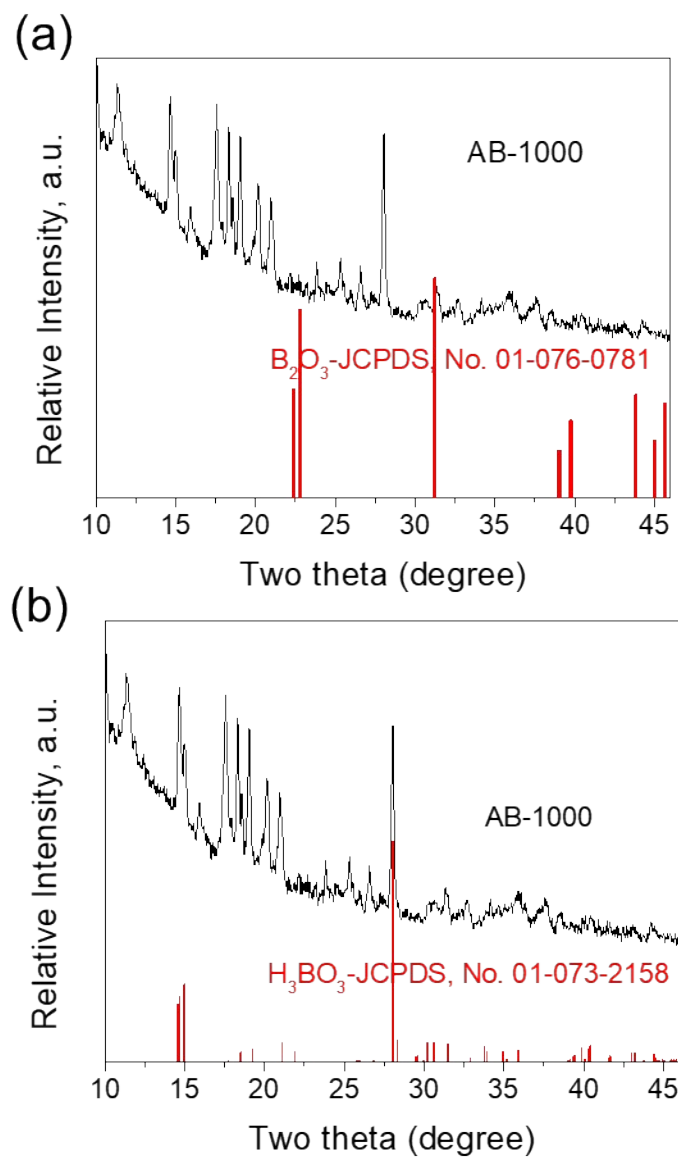

**Figure S13.** Comparison of XRD spectrum of A-B-1000 with JCPDS cards of (a)  $B_2O_3$  and (b)  $H_3BO_3$ .

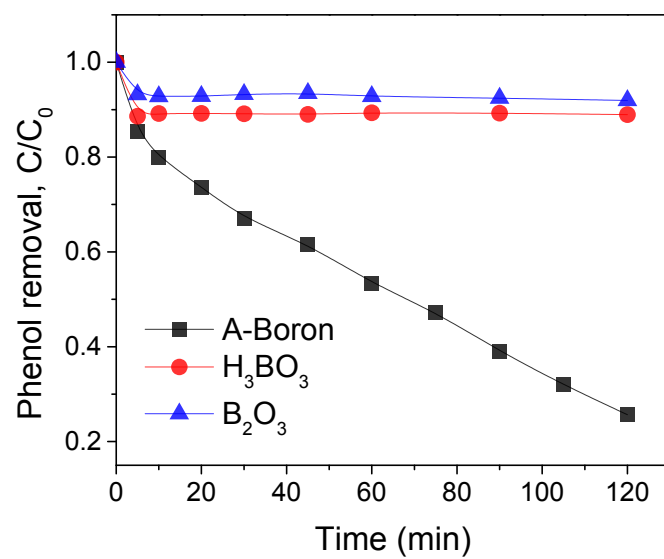

**Figure S14.** Reactivity comparison of A-Boron with  $B_2O_3$  and  $H_3BO_3$ . (Experimental conditions: phenol = 0.1 mM, catalyst = 0.2 g/L, PMS = 3.3 mM, temperature = 25 °C)

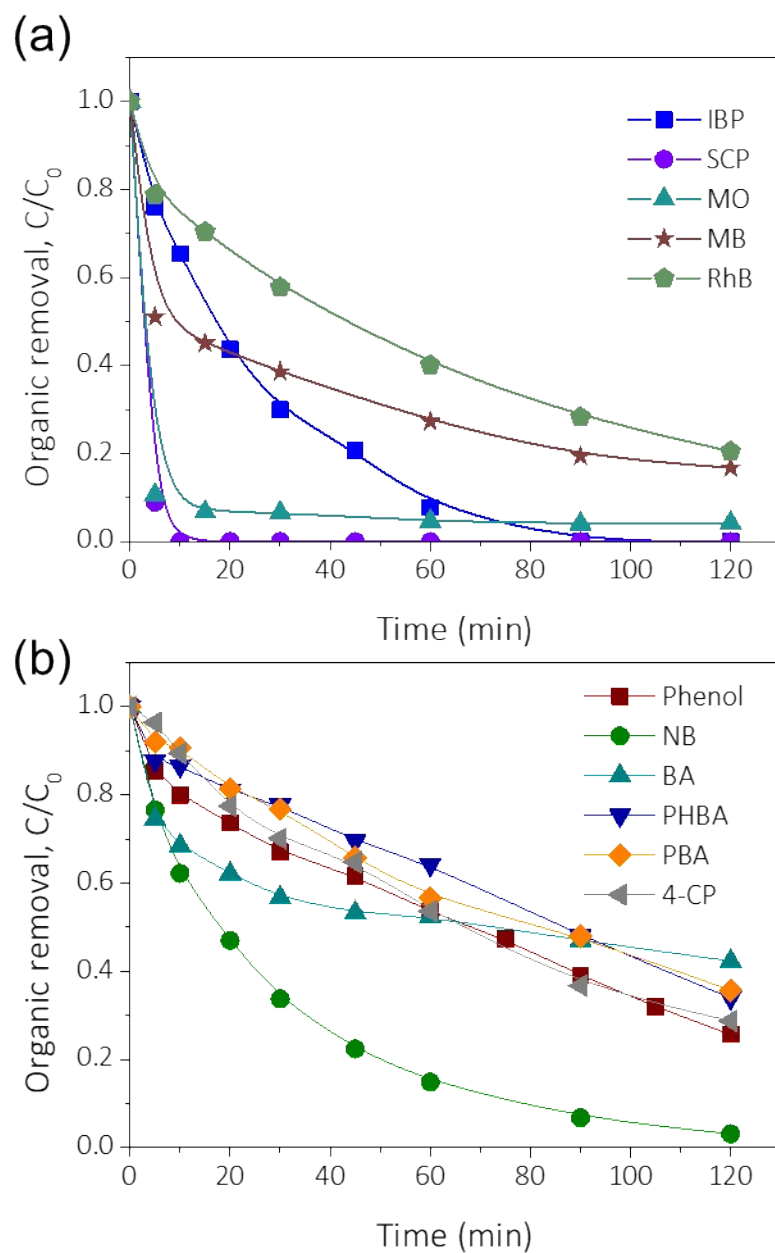

**Figure S15.** Catalytic degradation of various organic contaminants by A-Boron/PMS system. (Experimental conditions: organics = 0.1 mM, catalyst= 0.2 g/L, PMS = 3.3 mM, temperature = 25 °C)

*Top view*

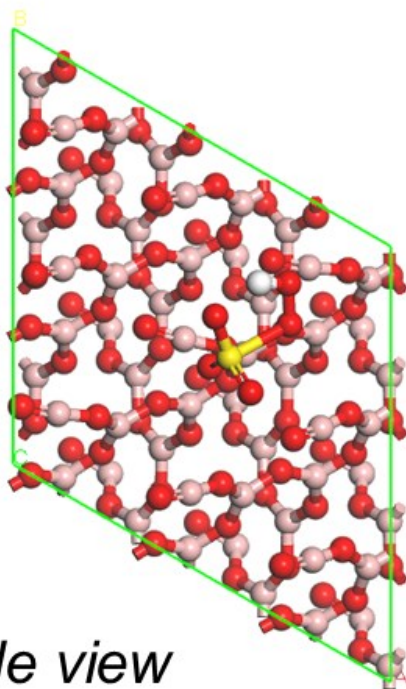

*Side view*

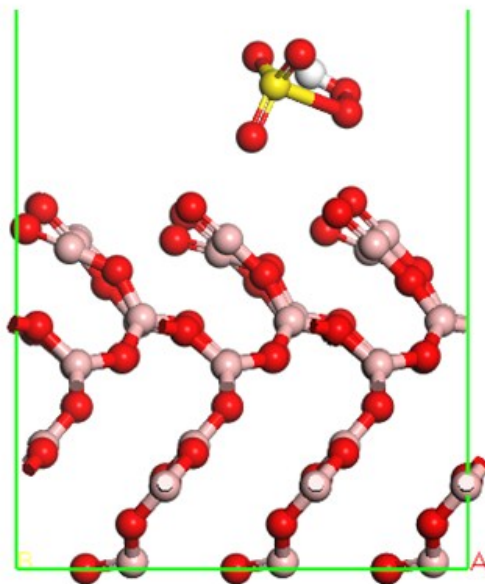

**Figure S16.** Illustration of PMS adsorption on the (0 0 1) termination of  $\text{B}_2\text{O}_3$ .

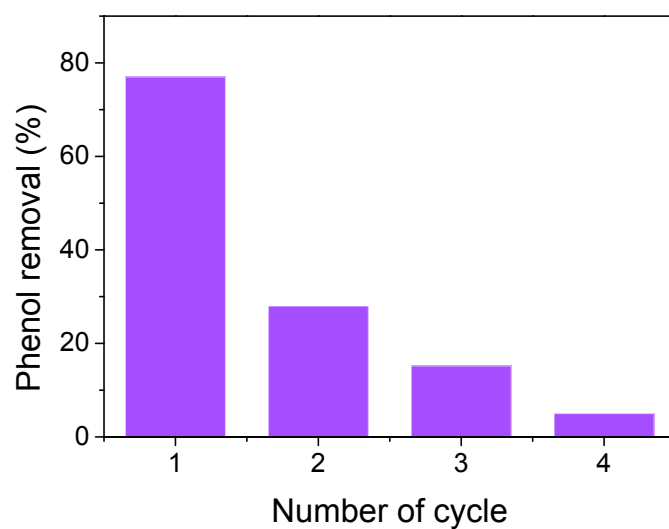

**Figure S17.** Stability of A-Boron for PMS activation and catalytic phenol oxidation for 180 min in multiple runs. (Experimental conditions: phenol = 0.2 mM, catalyst= 0.2 g/L, PMS = 3.3 mM, temperature = 25 °C)

*Top view*

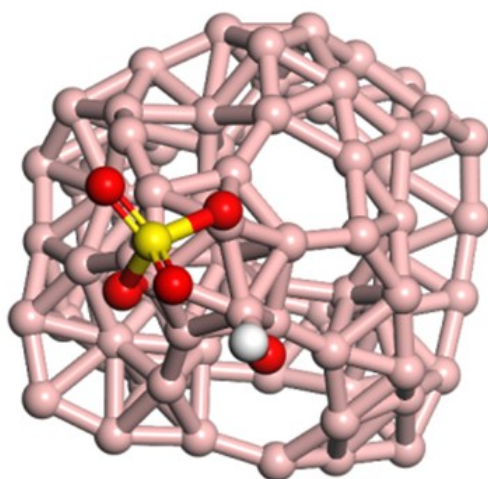

*Side view*

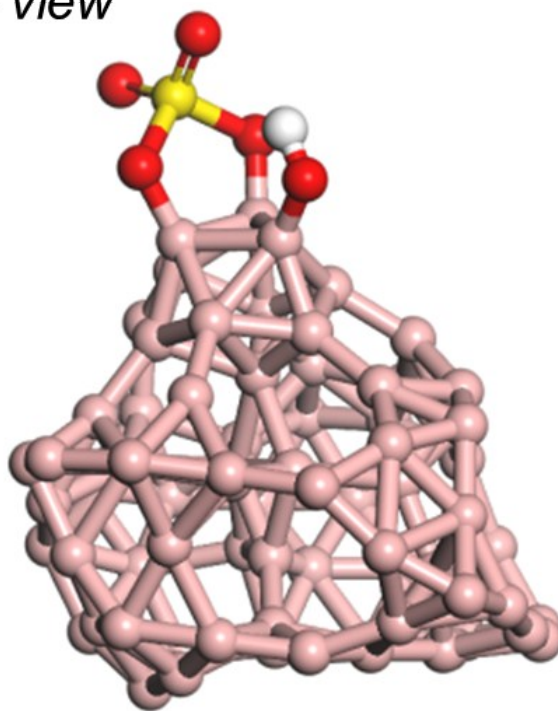

**Figure S18.** Illustration of PMS dissociate over a structurally relaxed B75 cluster.



**Table S1.** Summary of electron transfer from boron to activated PMS and the associated adsorption energies.

| Boron Terminations<br>or Structure | Charge transfer<br>to OH (e) | Charge transfer<br>to SO <sub>4</sub> (e)  | Total charge<br>transfer (e) | Adsorption<br>energy (eV) |
|------------------------------------|------------------------------|--------------------------------------------|------------------------------|---------------------------|
| (1 0 0)                            | 0.180                        | 0.644                                      | 0.824                        | -7.58                     |
| (1 0 1)                            | 0.194                        | 0.794                                      | 0.988                        | -10.6                     |
| (1 1 0)                            | 0.061                        | 0.657                                      | 0.718                        | -7.18                     |
| B75 cluster                        | 0.163                        | 0.716                                      | 0.879                        | -9.58                     |
|                                    | Charge transfer<br>to O (e)  | Charge transfer<br>to HSO <sub>4</sub> (e) | Total charge<br>transfer (e) |                           |
| (0 0 1)                            | 0.506                        | 0.282                                      | 0.788                        | -7.91                     |
| (1 1 1)                            | 0.371                        | 0.295                                      | 0.666                        | -7.34                     |

## References

1. X. Wang and Y. D. Li, *Chem.-Eur. J.*, 2003, **9**, 300-306.
2. E. Saputra, S. Muhammad, H. Q. Sun, H. M. Ang, M. O. Tade and S. B. Wang, *Appl. Catal. B*, 2013, **142**, 729-735.
3. Y. J. Yao, Z. H. Yang, H. Q. Sun and S. B. Wang, *Ind. Eng. Chem. Res.*, 2012, **51**, 14958-14965.
3. Y. X. Wang, H. Q. Sun, H. M. Ang, M. O. Tade and S. B. Wang, *Chem. Eng. J.*, 2014, **245**, 1-9.
